# Supplementary material
Source: PubMed Central journal article supplement (PMC8942327)
Supplement: NIHMS1777385-supplement-supp_2.pdf [file NIHMS1777385-supplement-supp_2.pdf]

# Supporting Information

## DeepAtom: A Framework for Protein-Ligand Binding Affinity Prediction

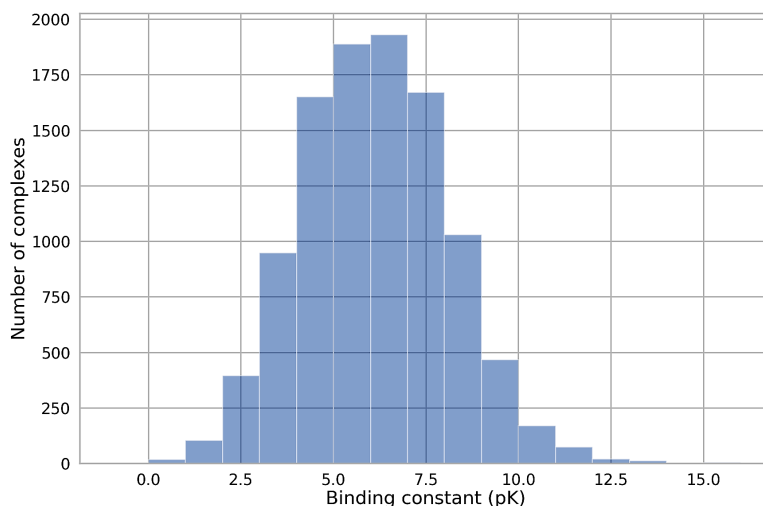

Figure S1. Binding score distribution of the full proposed benchmark data set (10,383 complexes), including the “training set-2” (9,383 complexes) and validation (1,000 complexes).

Table S1. Validation (377 complexes) results with the “training set-1”.

|          | RMSE          | MAE           | SD            | R             |
|----------|---------------|---------------|---------------|---------------|
| DeepAtom | 1.348 (0.003) | 0.996 (0.015) | 1.340 (0.028) | 0.740 (0.013) |
| RF-Score | 1.403 (0.003) | 1.064 (0.002) | 1.405 (0.003) | 0.709 (0.001) |
| Pafnucy  | 1.542 (0.008) | 1.192 (0.006) | 1.534 (0.009) | 0.638 (0.006) |

Table S2. Validation (1000 complexes) results with the “training set-2”.

|          | RMSE          | MAE           | SD            | R             |
|----------|---------------|---------------|---------------|---------------|
| DeepAtom | 1.230 (0.012) | 0.891 (0.013) | 1.223 (0.011) | 0.801 (0.004) |
| RF-Score | 1.326 (0.003) | 1.041 (0.002) | 1.320 (0.003) | 0.767 (0.001) |
| Pafnucy  | 1.451 (0.021) | 1.153 (0.019) | 1.452 (0.022) | 0.710 (0.008) |
